# Supplementary material
Source: Royal Society of Chemistry journal article supplement (doi:10.1039/d6ew00193a)
Supplement: d6ew00193a1.pdf [file d6ew00193a1.pdf]

***Supplementary Information: Improved prediction of pharmaceutical concentrations in wastewater using numerical correction factors applied to prescribing information***

Bruce Petrie<sup>a\*</sup>, Elise Cartmell<sup>b</sup>

<sup>a</sup>School of Pharmacy, Applied Sciences and Public Health, Robert Gordon University, Aberdeen, AB10 7GJ, UK

<sup>b</sup>Scottish Water, 55 Buckstone Terrace, Edinburgh EH10 6XH, UK

\*Corresponding author email: [b.r.petrie@rgu.ac.uk](mailto:b.r.petrie@rgu.ac.uk)

The supplementary information contains three figures and 12 tables with images of laboratory-scale sewers, analyte stability in collected wastewaters, relationship between prediction error and analyte excretion, molar concentration of propranolol and propranolol glucuronide during sewer studies, wastewater flow information, the UPLC gradient and MRM information, instrument and method performance detail, literature excretion data for analytes, trueness vales for the analytical method, the range of numerical correction factors for individual WWTPs and data from river water predictions.

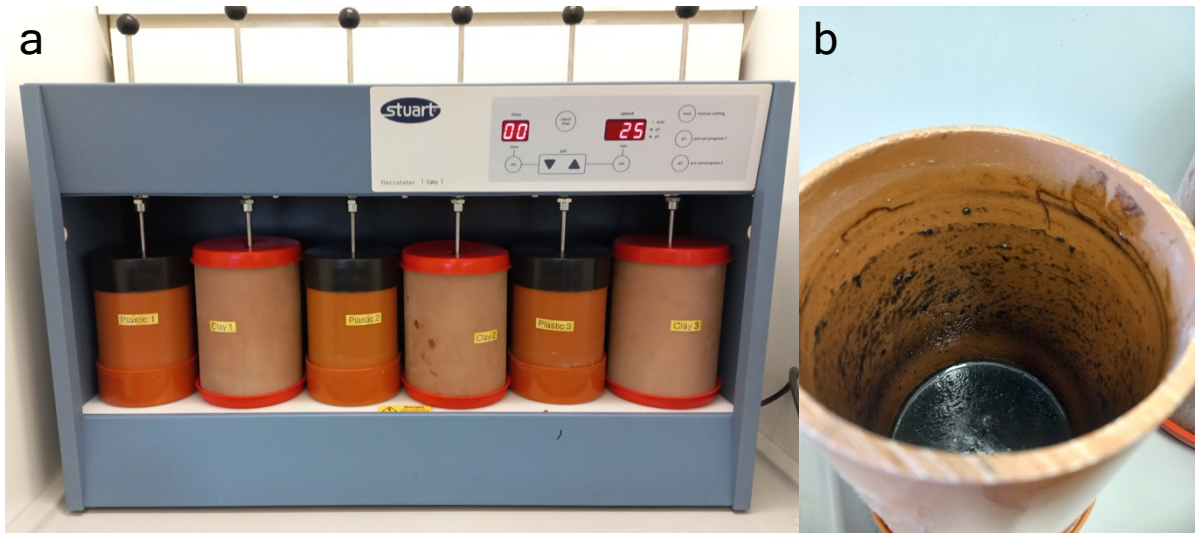

*Figure S1.* Laboratory-scale gravity sewers (a) and biofilm on pipe surface observed during wastewater change (b).

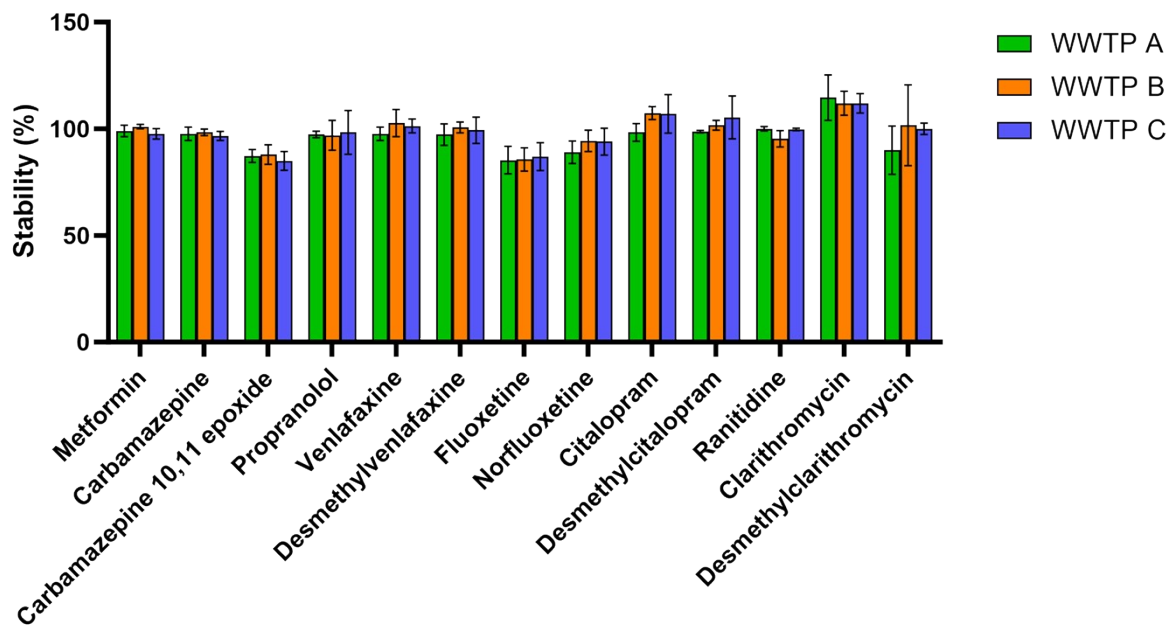

Figure S2. Analyte stability in collected wastewater from WWTP A, B and C during 12 hours. Note: a stability value of 100 % demonstrates no change in concentration.

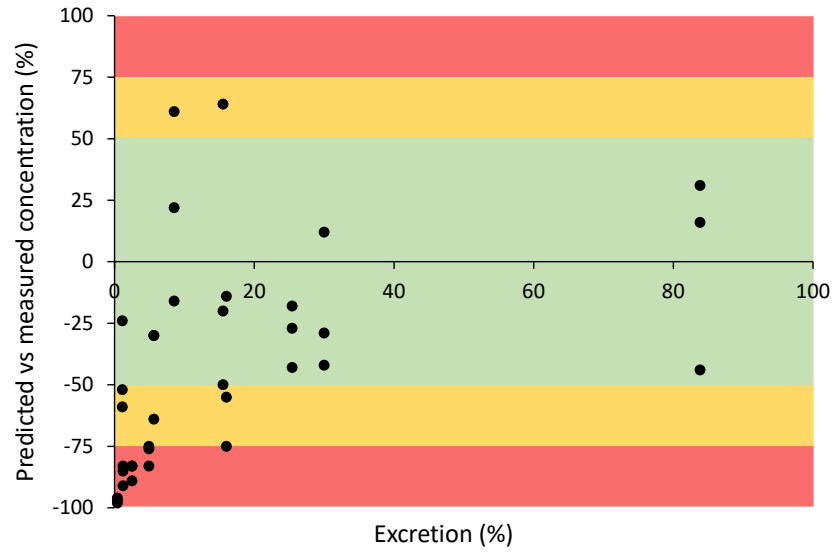

*Figure S3.* Relationship between median analyte excretion rate (*Table S5*) and concentration difference between predicted and measured analyte concentrations for WWTP A, B and C. Results from each WWTP is plotted as an individual data point. Area shaded green represent  $\pm 50\%$ , orange  $\pm 51 - 75\%$ , and red  $> \pm 75\%$  difference between the predicted and measured concentrations.

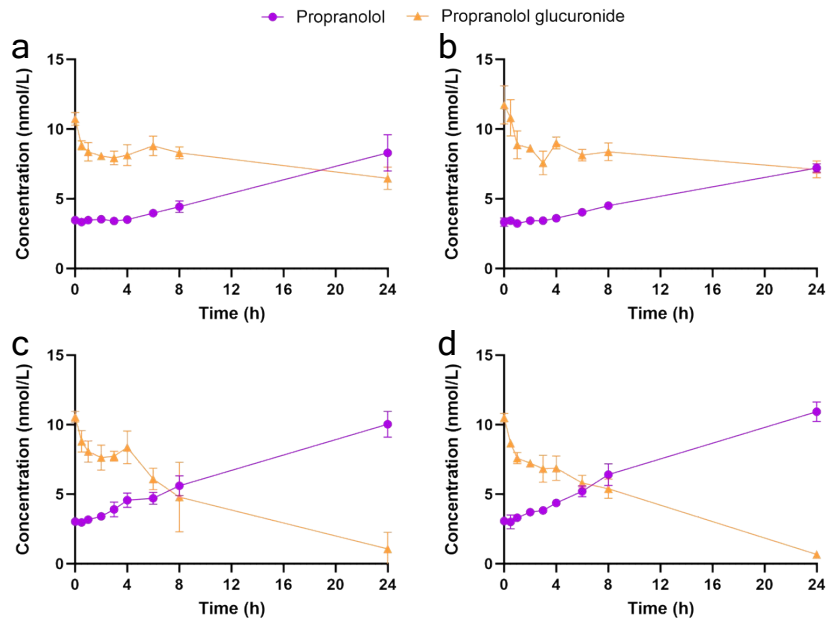

Figure S4. Propranolol and propranolol  $\beta$ -D-glucuronide molar concentrations in wastewater of laboratory-scale control and test gravity sewers during 24 hours ( $n = 3$ ). Control sewers have no previously established biofilm on pipe surfaces or sludge layer. Test sewers were previously in operation for  $> 6$  months to establish biofilm and sludge layer. Key: a, control – vitrified clay; b, control – plastic (PVC); c, test – vitrified clay; d, test – plastic (PVC).

*Table S1.* Wastewater flow data for individual sampling dates of WWTP A, B and C

| <b>WWTP</b> | <b>Sampling date</b> | <b>Flow (L/d)</b>  |
|-------------|----------------------|--------------------|
| A           | 21/08/23 – 22/08/23  | $7.69 \times 10^7$ |
|             | 22/08/23 – 23/08/23  | $7.31 \times 10^7$ |
|             | 23/08/23 – 24/08/23  | $8.44 \times 10^7$ |
|             | 28/08/23 – 29/08/23  | $7.56 \times 10^7$ |
|             | 29/08/23 – 30/08/23  | $8.64 \times 10^7$ |
| B           | 22/08/23 – 23/08/23  | $1.16 \times 10^7$ |
|             | 23/08/23 – 24/08/23  | $1.32 \times 10^7$ |
|             | 28/08/23 – 29/08/23  | $1.13 \times 10^7$ |
|             | 29/08/23 – 30/08/23  | $1.36 \times 10^7$ |
|             | 30/08/23 – 31/08/23  | $1.18 \times 10^7$ |
| C           | 21/08/23 – 22/08/23  | $5.53 \times 10^6$ |
|             | 23/08/23 – 24/08/23  | $5.36 \times 10^6$ |
|             | 28/08/23 – 29/08/23  | $6.00 \times 10^6$ |
|             | 29/08/23 – 30/08/23  | $8.22 \times 10^6$ |
|             | 30/08/23 – 31/08/23  | $7.56 \times 10^6$ |

*Table S2.* Mobile phase composition and gradient programme for UPLC analysis

| <b>Time (min)</b> | <b>Flow rate (mL/min)</b> | <b>Mobile phase A % (5 mM ammonium formate + 0.1 % formic acid in ultrapure water)</b> | <b>Mobile phase B % (5 mM ammonium formate + 0.1 % formic acid in methanol)</b> |
|-------------------|---------------------------|----------------------------------------------------------------------------------------|---------------------------------------------------------------------------------|
| 0                 | 0.35                      | 95                                                                                     | 5                                                                               |
| 0.5               |                           | 95                                                                                     | 5                                                                               |
| 9                 |                           | 20                                                                                     | 80                                                                              |
| 11                |                           | 20                                                                                     | 80                                                                              |
| 11.1              |                           | 95                                                                                     | 5                                                                               |
| 14                |                           | 95                                                                                     | 5                                                                               |

Table S3. Retention times and multiple reaction monitoring parameters for studied analytes

| Analyte                                                | Time (min)  | Precursor (m/z) | Cone (V) | Quantifier (m/z) | Collision energy (eV) | Qualifier (m/z) | Collision energy (eV) |
|--------------------------------------------------------|-------------|-----------------|----------|------------------|-----------------------|-----------------|-----------------------|
| Metformin                                              | 0.86        | 130.2           | 27       | 60.1             | 12                    | 71.2            | 17                    |
| Carbamazepine                                          | 6.89        | 237.2           | 33       | 194.2            | 18                    | 179.2           | 32                    |
| Carbamazepine-10,11-epoxide                            | 5.83        | 253.1           | 20       | 180.1            | 20                    | 210.2           | 14                    |
| Propranolol                                            | 5.83        | 260.2           | 50       | 116.1            | 16                    | 183.1           | 18                    |
| Venlafaxine                                            | 5.61        | 278.3           | 36       | 260.3            | 10                    | 215.2           | 16                    |
| Desmethylvenlafaxine                                   | 4.25        | 264.3           | 29       | 246.3            | 12                    | 107.1           | 30                    |
| Fluoxetine                                             | 7.37        | 310.2           | 34       | 44.1             | 10                    | 148.1           | 10                    |
| Norfluoxetine                                          | 7.39        | 296.2           | 10       | 134.2            | 5                     | -               | -                     |
| Citalopram                                             | 5.93        | 325.2           | 24       | 262.2            | 20                    | 116.1           | 25                    |
| Desmethylcitalopram                                    | 5.97        | 311.2           | 22       | 109.1            | 20                    | 262.2           | 17                    |
| Ranitidine                                             | 2.36        | 315.2           | 31       | 176.1            | 16                    | 130.1           | 25                    |
| Ranitidine-N-oxide                                     | 2.52        | 331.2           | 20       | 176.1            | 17                    | 102.1           | 33                    |
| Clarithromycin                                         | 7.76        | 748.5           | 29       | 158.2            | 32                    | 558.4           | 24                    |
| Desmethylclarithromycin                                | 7.76        | 734.6           | 28       | 144.2            | 30                    | 576.5           | 18                    |
| Propranolol $\beta$ -D-glucuronide <sup>a</sup>        | 5.85 & 6.17 | 436.6           | 15       | 260.6            | 21                    | 116.6           | 31                    |
| Metformin- <i>d</i> <sub>6</sub>                       | 0.86        | 136.3           | 28       | 60.1             | 13                    | -               | -                     |
| Carbamazepine- <i>d</i> <sub>10</sub>                  | 6.82        | 247.1           | 33       | 204.2            | 20                    | -               | -                     |
| Propranolol- <i>d</i> <sub>7</sub>                     | 5.78        | 267.1           | 22       | 189.2            | 18                    | -               | -                     |
| Venlafaxine- <i>d</i> <sub>6</sub>                     | 5.58        | 284.3           | 34       | 266.3            | 12                    | -               | -                     |
| Fluoxetine- <i>d</i> <sub>6</sub>                      | 7.34        | 316.1           | 19       | 154.2            | 9                     | -               | -                     |
| Norfluoxetine- <i>d</i> <sub>6</sub>                   | 7.36        | 302.3           | 10       | 140.2            | 6                     | -               | -                     |
| Citalopram- <i>d</i> <sub>6</sub>                      | 5.93        | 331.2           | 24       | 109.1            | 31                    | -               | -                     |
| Carbamazepine- <i>d</i> <sub>10</sub>                  | 6.82        | 247.1           | 33       | 204.2            | 20                    | -               | -                     |
| Clarithromycin- <sup>13</sup> C- <i>d</i> <sub>3</sub> | 7.76        | 752.6           | 25       | 162.2            | 29                    | -               | -                     |

<sup>a</sup>Two propranolol  $\beta$ -D-glucuronide peaks were combined for data reporting purposes

Note: electrospray ionisation mode = positive, capillary voltage = 2.6 kV, nebulising and desolvation gas = nitrogen, collision gas = argon, gas temperature = 400 °C, desolvation gas flow = 550 L/min, nebulising pressure = 7.0 bar, and cone gas flow = 150 L/h.

Table S4. Analytical method and performance detail for studied pharmaceuticals and metabolites.

| <b>Pharmaceutical</b>              | <b>Isotopically labelled surrogate</b> | <b>Linear range (µg/L)</b> | <b><math>r^2</math></b> | <b>MLQ (µg/L)</b> |
|------------------------------------|----------------------------------------|----------------------------|-------------------------|-------------------|
| Metformin                          | Metformin- $d_6$                       | 0.10-200                   | 0.997                   | 0.10              |
| Carbamazepine                      | Carbamazepine- $d_{10}$                | 0.01-5                     | 0.998                   | 0.01              |
| Carbamazepine-10,11-epoxide        | Carbamazepine- $d_{10}$                | 0.01-5                     | 0.999                   | 0.01              |
| Propranolol                        | Propranolol- $d_7$                     | 0.01-20                    | 0.997                   | 0.01              |
| Venlafaxine                        | Venlafaxine- $d_6$                     | 0.01-7.5                   | 0.999                   | 0.01              |
| Desmethylvenlafaxine               | Venlafaxine- $d_6$                     | 0.01-7.5                   | 1.000                   | 0.01              |
| Fluoxetine                         | Fluoxetine- $d_6$                      | 0.01-5                     | 1.000                   | 0.01              |
| Norfluoxetine                      | Norfluoxetine- $d_6$                   | 0.01-5                     | 0.998                   | 0.01              |
| Citalopram                         | Citalopram- $d_6$                      | 0.01-5                     | 1.000                   | 0.01              |
| Desmethylcitalopram                | Citalopram- $d_6$                      | 0.01-5                     | 1.000                   | 0.01              |
| Ranitidine                         | Carbamazepine- $d_{10}$                | 0.01-5                     | 1.000                   | 0.01              |
| Ranitidine-N-oxide                 | Carbamazepine- $d_{10}$                | 0.01-20                    | 1.000                   | 0.01              |
| Clarithromycin                     | Clarithromycin- $^{13}C-d_3$           | 0.01-5                     | 0.997                   | 0.01              |
| Desmethylclarithromycin            | Clarithromycin- $^{13}C-d_3$           | 0.01-5                     | 0.998                   | 0.01              |
| Propranolol $\beta$ -D-glucuronide | Propranolol- $d_7$                     | 0.05-10                    | 0.997                   | 0.05              |

Key: MLQ, method quantitation limit

Table S5. Excretion data for pharmaceuticals and metabolites from studies reporting oral medicine consumption and urine collected for a sufficient length of time considering drug half-life.

| Pharmaceutical/metabolite   | Excretion (%) |        |       | Reference | Median total excretion (%) |
|-----------------------------|---------------|--------|-------|-----------|----------------------------|
|                             | Urine         | Faeces | Total |           |                            |
| Metformin                   | 99            | -      | 99    | 1         | 90.5                       |
|                             | -             | -      | 90.5  | 2         |                            |
|                             | 50            | 27     | 77    | 3         |                            |
| Carbamazepine               | 2             | 12.5   | 14.5  | 4         | 1.2                        |
|                             | 2             | -      | 2     | 5         |                            |
|                             | 0.52          | -      | 0.52  | 6         |                            |
|                             | 0.48          | -      | 0.48  | 7         |                            |
|                             | 1.19          | -      | 1.19  | 8         |                            |
|                             | 0.4           | -      | 0.4   | 9         |                            |
|                             | 3.0           | -      | 3     | 10        |                            |
| Carbamazepine-10,11-epoxide | 0.5           | -      | 0.5   | 1         | 1.1                        |
|                             | 1             | -      | 1     | 4         |                            |
|                             | 1.1           | -      | 1.1   | 6         |                            |
|                             | 1.45          | -      | 1.45  | 7         |                            |
|                             | 2.6           | -      | 2.6   | 8         |                            |
|                             | 1.1           | -      | 1.1   | 9         |                            |
|                             | 1.1           | -      | 1.1   | 11        |                            |
| 1.3                         | -             | 1.3    | 12    |           |                            |
| Propranolol                 | 13.6          | -      | 13.6  | 13        | 0.4                        |
|                             | 0.4           | -      | 0.4   | 14        |                            |
|                             | 0.37          | -      | 0.37  | 15        |                            |
|                             | 12.26         | -      | 12.26 | 16        |                            |
|                             | 0.2           | -      | 0.2   | 17        |                            |
|                             | 0.25          | -      | 0.25  | 18        |                            |
| Venlafaxine                 | 4.025         | -      | 4.025 | 19        | 4.9                        |
|                             | 5.1           | -      | 5.1   | 20        |                            |
|                             | 4.7           | -      | 4.7   | 21        |                            |
|                             | 5.2           | -      | 5.2   | 22        |                            |
| Desmethylvenlafaxine        | 22.35         | -      | 22.35 | 19        | 25.4                       |
|                             | 20.00         | -      | 20    | 20        |                            |
|                             | 29.4          | -      | 29.4  | 21        |                            |
|                             | 28.5          | -      | 28.5  | 22        |                            |
| Fluoxetine                  | 1.25          | -      | 1.25  | 1         | 2.5                        |
|                             | 2.5           | -      | 2.5   | 23        |                            |
|                             | 11            | -      | 11    | 24        |                            |
| Norfluoxetine               | 10            | -      | 10    | 23        | 8.5                        |
|                             | 7             | -      | 7     | 24        |                            |
| Citalopram                  | 26            | -      | 26    | 25        | 16.0                       |
|                             | 18.7          | -      | 18.7  | 26        |                            |
|                             | 14.9          | -      | 14.9  | 27        |                            |
|                             | 16            | -      | 16    | 28        |                            |
|                             | 8             | -      | 8     | 29        |                            |
| Desmethylcitalopram         | 19            | -      | 19    | 25        | 15.5                       |
|                             | 16.6          | -      | 16.6  | 28        |                            |
|                             | 9.6           | -      | 9.6   | 29        |                            |
|                             | 14.3          | -      | 14.3  | 26        |                            |
| Ranitidine                  | 30            | -      | 30    | 1         | 28.5                       |
|                             | 26            | -      | 26    | 30        |                            |
|                             | 60            | -      | 60    | 31        |                            |
|                             | 27            | -      | 27    | 32        |                            |

|                           |       |     |       |    |      |
|---------------------------|-------|-----|-------|----|------|
| Ranitidine-N-oxide        | 4     | -   | 4     | 30 | 4.0  |
| Clarithromycin            | 35    | -   | 35    | 1  | 30.0 |
|                           | 30    | -   | 30    | 33 |      |
|                           | 48.4  | -   | 48.4  | 34 |      |
|                           | 14.5  | -   | 14.5  | 35 |      |
|                           | 22.55 | -   | 22.55 | 36 |      |
|                           | 18    | 4   | 22    | 37 |      |
|                           | 23.9  | 7.5 | 31.4  | 38 |      |
| N-desmethylclarithromycin | 0.9   | 4.7 | 5.6   | 38 | 5.6  |

Key: -, not reported or investigated

Table S6. Determined trueness of the direct injection UHPLC-MS/MS method applied to influent wastewaters from WWTP A, B and C (n = 3)

| Analyte                     | Method trueness (%) |         |          |
|-----------------------------|---------------------|---------|----------|
|                             | WWTP A              | WWTP B  | WWTP C   |
| Metformin                   | 91 ± 7              | 95 ± 14 | 91 ± 4   |
| Carbamazepine               | 107 ± 4             | 110 ± 3 | 104 ± 5  |
| Carbamazepine-10,11-epoxide | 126 ± 7             | 119 ± 3 | 130 ± 7  |
| Propranolol                 | 101 ± 3             | 103 ± 7 | 97 ± 2   |
| Venlafaxine                 | 106 ± 3             | 104 ± 6 | 102 ± 4  |
| Desmethylvenlafaxine        | 113 ± 5             | 97 ± 3  | 95 ± 5   |
| Fluoxetine                  | 101 ± 5             | 100 ± 4 | 103 ± 4  |
| Norfluoxetine               | 102 ± 9             | 110 ± 6 | 110 ± 2  |
| Citalopram                  | 106 ± 5             | 109 ± 6 | 110 ± 5  |
| Desmethylcitalopram         | 96 ± 4              | 99 ± 8  | 96 ± 4   |
| Ranitidine                  | 93 ± 9              | 102 ± 4 | 132 ± 17 |
| Ranitidine-N-oxide          | 77 ± 7              | 87 ± 3  | 97 ± 8   |
| Clarithromycin              | 117 ± 1             | 115 ± 3 | 114 ± 7  |
| Desmethylclarithromycin     | 100 ± 1             | 101 ± 4 | 99 ± 8   |

Table S7. Range of individual influent wastewater numerical correction factors ( $NF_{inf}$ ) determined for pharmaceuticals at WWTP A, B and C

| <b>Analyte</b>              | <b>WWTP A (n=5)</b> | <b>WWTP B (n=5)</b> | <b>WWTP C (n=5)</b> |
|-----------------------------|---------------------|---------------------|---------------------|
| Metformin                   | 0.66 – 0.86         | 1.62 – 1.82         | 0.68 – 0.95         |
| Carbamazepine               | 0.063 – 0.091       | 0.11 – 0.17         | 0.050 – 0.17        |
| Carbamazepine-10,11-epoxide | 0.013 – 0.015       | 0.027 – 0.031       | 0.020 – 0.031       |
| Propranolol                 | 0.074 – 0.19        | 0.17 – 0.23         | 0.092 – 0.14        |
| Venlafaxine                 | 0.16 – 0.25         | 0.29 – 0.32         | 0.18 – 0.29         |
| Desmethylvenlafaxine        | 0.29 – 0.32         | 0.43 – 0.54         | 0.34 – 0.49         |
| Fluoxetine                  | 0.11 – 0.17         | 0.24 – 0.26         | 0.12 – 0.24         |
| Norfluoxetine               | 0.057 – 0.074       | 0.080 – 0.12        | 0.047 – 0.080       |
| Citalopram                  | 0.33 – 0.38         | 0.58 – 0.76         | 0.18 – 0.25         |
| Desmethylcitalopram         | 0.18 – 0.20         | 0.32 – 0.35         | 0.091 – 0.13        |
| Clarithromycin              | 0.31 – 0.33         | 0.41 – 0.65         | 0.20 – 0.43         |
| Desmethylclarithromycin     | 0.046 – 0.083       | 0.11 – 0.22         | 0.085 – 0.12        |

Table S8. Measured and predicted concentrations of metformin inputs into river water from WWTP D and WWTP E. Those highlighted green represent  $\pm 50$  %, orange  $\pm 51 - 75$  %, and red  $> \pm 75$  % difference between predicted and measured concentrations.

| WWTP     | Date     | Average prescribed (g/d) | River flow (m <sup>3</sup> /s) | Predicted (µg/L) | Measured (µg/L) | Difference (%) |
|----------|----------|--------------------------|--------------------------------|------------------|-----------------|----------------|
| D        | 30/01/17 | 8758                     | 25.2                           | 0.035            | 0               | -              |
|          | 06/02/17 | 9436                     | 56.5                           | 0.017            | 0.20            | -92            |
|          | 27/03/17 | 9020                     | 28.9                           | 0.031            | 1.2             | -97            |
|          | 25/04/17 | 8929                     | 13.0                           | 0.070            | 0.50            | -86            |
|          | 08/05/17 | 9535                     | 8.70                           | 0.11             | -               | -              |
|          | 05/06/17 | 9560                     | 31.3                           | 0.031            | 3.9             | -99            |
|          | 03/07/17 | 8708                     | 24.9                           | 0.035            | 0.40            | -91            |
|          | 07/08/17 | 9454                     | 29.9                           | 0.032            | 0.20            | -84            |
|          | 04/09/17 | 9457                     | 35.5                           | 0.027            | 0               | -              |
|          | 09/10/17 | 9211                     | 36.3                           | 0.026            | 0               | -              |
|          | 06/11/17 | 9487                     | 32.6                           | 0.029            | 0.10            | -71            |
|          | 04/12/17 | 9593                     | 29.3                           | 0.033            | 0               | -              |
|          | E        | 18/01/17                 | 499                            | 0.292            | 0.17            | 1.1            |
| 15/02/17 |          | 492                      | 0.359                          | 0.14             | 1.5             | -91            |
| 08/03/17 |          | 531                      | 0.933                          | 0.057            | 0.30            | -81            |
| 26/04/17 |          | 440                      | 0.134                          | 0.33             | 0.90            | -63            |
| 17/05/17 |          | 543                      | 0.109                          | 0.50             | 0.10            | +400           |
| 14/06/17 |          | 462                      | 0.284                          | 0.16             | 0.10            | +60            |
| 12/07/17 |          | 492                      | 0.146                          | 0.34             | 0.40            | -15            |
| 16/08/17 |          | 496                      | 0.407                          | 0.12             | 0.30            | -60            |
| 13/09/17 |          | 497                      | 0.814                          | 0.061            | 0.10            | -39            |
| 18/10/17 |          | 521                      | 0.742                          | 0.070            | 0               | -              |
| 15/11/17 |          | 501                      | 0.320                          | 0.062            | 0               | -              |
| 13/12/17 |          | 530                      | 0.854                          | 0.062            | 4.3             | -99            |

Table S9. Measured and predicted concentrations of carbamazepine inputs into river water from WWTP D and WWTP E. Those highlighted green represent  $\pm 50\%$ , orange  $\pm 51 - 75\%$ , and red  $> \pm 75\%$  difference between predicted and measured concentrations.

| WWTP | Date     | Average prescribed (g/d) | River flow (m <sup>3</sup> /s) | Predicted (µg/L) | Measured (µg/L) | Difference (%) |
|------|----------|--------------------------|--------------------------------|------------------|-----------------|----------------|
| D    | 30/01/17 | 532                      | 25.2                           | 0.023            | 0.029           | -21            |
|      | 06/02/17 | 594                      | 56.5                           | 0.011            | 0.010           | +10            |
|      | 27/03/17 | 517                      | 28.9                           | 0.020            | 0.034           | -41            |
|      | 25/04/17 | 556                      | 13.0                           | 0.047            | 0.038           | +24            |
|      | 08/05/17 | 562                      | 8.70                           | 0.071            | 0.044           | +61            |
|      | 05/06/17 | 567                      | 31.3                           | 0.020            | 0.058           | -66            |
|      | 03/07/17 | 526                      | 24.9                           | 0.023            | 0.039           | -41            |
|      | 07/08/17 | 563                      | 29.9                           | 0.021            | 0.036           | -42            |
|      | 04/09/17 | 540                      | 35.5                           | 0.017            | 0.056           | -70            |
|      | 09/10/17 | 548                      | 36.3                           | 0.016            | 0.021           | -24            |
|      | 06/11/17 | 534                      | 32.6                           | 0.018            | 0.024           | -25            |
|      | 04/12/17 | 556                      | 29.3                           | 0.021            | 0.029           | -28            |
| E    | 18/01/17 | 26.7                     | 0.292                          | 0.10             | 0.054           | +85            |
|      | 15/02/17 | 34.7                     | 0.359                          | 0.10             | 0.14            | -29            |
|      | 08/03/17 | 19.7                     | 0.933                          | 0.022            | 0.011           | +100           |
|      | 26/04/17 | 31.8                     | 0.134                          | 0.25             | 0.11            | +127           |
|      | 17/05/17 | 26.1                     | 0.109                          | 0.25             | 0.26            | -4             |
|      | 14/06/17 | 30.7                     | 0.284                          | 0.11             | 0.46            | -76            |
|      | 12/07/17 | 30.4                     | 0.146                          | 0.22             | 0.12            | +83            |
|      | 16/08/17 | 30.0                     | 0.407                          | 0.077            | 0.067           | 15             |
|      | 13/09/17 | 25.9                     | 0.814                          | 0.033            | 0.016           | +106           |
|      | 18/10/17 | 39.3                     | 0.742                          | 0.055            | 0.021           | +162           |
|      | 15/11/17 | 23.2                     | 0.320                          | 0.075            | 0.051           | +47            |
|      | 13/12/17 | 34.8                     | 0.854                          | 0.042            | 0.089           | -53            |

Table S10. Measured and predicted concentrations of propranolol inputs into river water from WWTP D and WWTP E. Those highlighted green represent  $\pm 50\%$ , orange  $\pm 51 - 75\%$ , and red  $> \pm 75\%$  difference between predicted and measured concentrations.

| WWTP | Date     | Average prescribed (g/d) | River flow (m <sup>3</sup> /s) | Predicted (µg/L) | Measured (µg/L) | Difference (%) |
|------|----------|--------------------------|--------------------------------|------------------|-----------------|----------------|
| D    | 30/01/17 | 241                      | 25.2                           | 0.013            | 0.027           | -52            |
|      | 06/02/17 | 258                      | 56.5                           | 0.0061           | 0.00060         | +917           |
|      | 27/03/17 | 265                      | 28.9                           | 0.012            | 0.0023          | +422           |
|      | 25/04/17 | 239                      | 13.0                           | 0.025            | 0.016           | +56            |
|      | 08/05/17 | 262                      | 8.70                           | 0.040            | 0.026           | +54            |
|      | 05/06/17 | 272                      | 31.3                           | 0.012            | 0.064           | -81            |
|      | 03/07/17 | 232                      | 24.9                           | 0.012            | 0.022           | -45            |
|      | 07/08/17 | 276                      | 29.9                           | 0.012            | 0.031           | -61            |
|      | 04/09/17 | 249                      | 35.5                           | 0.0093           | 0.040           | -77            |
|      | 09/10/17 | 269                      | 36.3                           | 0.010            | 0.0043          | +133           |
|      | 06/11/17 | 268                      | 32.6                           | 0.011            | 0.013           | -15            |
|      | 04/12/17 | 265                      | 29.3                           | 0.012            | 0.016           | -25            |
| E    | 18/01/17 | 11.1                     | 0.292                          | 0.053            | 0.028           | +89            |
|      | 15/02/17 | 14.0                     | 0.359                          | 0.054            | 0.050           | +8             |
|      | 08/03/17 | 13.7                     | 0.933                          | 0.020            | 0.0087          | +130           |
|      | 26/04/17 | 12.0                     | 0.134                          | 0.12             | 0.022           | +445           |
|      | 17/05/17 | 14.1                     | 0.109                          | 0.18             | 0.028           | +543           |
|      | 14/06/17 | 14.9                     | 0.284                          | 0.073            | 0.012           | +508           |
|      | 12/07/17 | 12.7                     | 0.146                          | 0.12             | 0.038           | +216           |
|      | 16/08/17 | 16.0                     | 0.407                          | 0.055            | 0.029           | +90            |
|      | 13/09/17 | 12.6                     | 0.814                          | 0.022            | 0.0077          | +186           |
|      | 18/10/17 | 15.9                     | 0.742                          | 0.030            | 0.0097          | +209           |
|      | 15/11/17 | 15.0                     | 0.320                          | 0.065            | 0.030           | +117           |
|      | 13/12/17 | 14.9                     | 0.854                          | 0.024            | 0.053           | -55            |

Table S11. Measured and predicted concentrations of fluoxetine inputs into river water from WWTP D and WWTP E. Those highlighted green represent  $\pm 50\%$ , orange  $\pm 51 - 75\%$ , and red  $> \pm 75\%$  difference between predicted and measured concentrations.

| WWTP | Date     | Average prescribed (g/d) | River flow (m <sup>3</sup> /s) | Predicted (µg/L) | Measured (µg/L) | Difference (%) |
|------|----------|--------------------------|--------------------------------|------------------|-----------------|----------------|
| D    | 30/01/17 | 109                      | 25.2                           | 0.0046           | 0.0022          | +109           |
|      | 06/02/17 | 115                      | 56.5                           | 0.0022           | 0.0012          | +83            |
|      | 27/03/17 | 112                      | 28.9                           | 0.0042           | 0.0025          | +68            |
|      | 25/04/17 | 107                      | 13.0                           | 0.0089           | 0.0027          | +230           |
|      | 08/05/17 | 113                      | 8.70                           | 0.014            | 0.0011          | +1,173         |
|      | 05/06/17 | 119                      | 31.3                           | 0.0041           | 0.010           | -59            |
|      | 03/07/17 | 108                      | 24.9                           | 0.0046           | 0.0044          | +5             |
|      | 07/08/17 | 116                      | 29.9                           | 0.0042           | 0.0029          | +45            |
|      | 04/09/17 | 110                      | 35.5                           | 0.0033           | 0.0048          | -31            |
|      | 09/10/17 | 117                      | 36.3                           | 0.0035           | 0.0017          | +106           |
|      | 06/11/17 | 120                      | 32.6                           | 0.0040           | 0.0016          | +150           |
|      | 04/12/17 | 115                      | 29.3                           | 0.0042           | 0.0015          | +180           |
| E    | 18/01/17 | 4.4                      | 0.292                          | 0.016            | 0.0043          | +272           |
|      | 15/02/17 | 4.9                      | 0.359                          | 0.015            | 0.0053          | +183           |
|      | 08/03/17 | 6.0                      | 0.933                          | 0.0069           | 0.0015          | +360           |
|      | 26/04/17 | 3.7                      | 0.134                          | 0.030            | 0               | -              |
|      | 17/05/17 | 5.2                      | 0.109                          | 0.051            | 0.0055          | +827           |
|      | 14/06/17 | 5.0                      | 0.284                          | 0.019            | 0.0017          | +1,018         |
|      | 12/07/17 | 4.6                      | 0.146                          | 0.034            | 0.0064          | +431           |
|      | 16/08/17 | 5.0                      | 0.407                          | 0.013            | 0.0078          | +67            |
|      | 13/09/17 | 4.8                      | 0.814                          | 0.0064           | 0.0015          | +327           |
|      | 18/10/17 | 4.7                      | 0.742                          | 0.0068           | 0.0023          | +196           |
|      | 15/11/17 | 5.9                      | 0.320                          | 0.020            | 0.0045          | +344           |
|      | 13/12/17 | 4.9                      | 0.854                          | 0.0062           | 0.0055          | +13            |

Table S12. Measured and predicted concentrations of clarithromycin inputs into river water from WWTP D and WWTP E. Those highlighted green represent  $\pm 50\%$ , orange  $\pm 51 - 75\%$ , and red  $> \pm 75\%$  difference between predicted and measured concentrations.

| WWTP | Date     | Average prescribed (g/d) | River flow (m <sup>3</sup> /s) | Predicted (µg/L) | Measured (µg/L) | Difference (%) |
|------|----------|--------------------------|--------------------------------|------------------|-----------------|----------------|
| D    | 30/01/17 | 330                      | 25.2                           | 0.028            | 0.034           | -18            |
|      | 06/02/17 | 298                      | 56.5                           | 0.011            | 0.019           | -42            |
|      | 27/03/17 | 279                      | 28.9                           | 0.021            | 0.037           | -43            |
|      | 25/04/17 | 246                      | 13.0                           | 0.041            | 0.030           | +37            |
|      | 08/05/17 | 266                      | 8.70                           | 0.066            | 0.019           | +247           |
|      | 05/06/17 | 237                      | 31.3                           | 0.016            | 0.069           | -77            |
|      | 03/07/17 | 198                      | 24.9                           | 0.017            | 0.028           | -39            |
|      | 07/08/17 | 240                      | 29.9                           | 0.017            | 0.029           | -41            |
|      | 04/09/17 | 280                      | 35.5                           | 0.017            | 0.031           | -45            |
|      | 09/10/17 | 279                      | 36.3                           | 0.017            | 0.023           | -26            |
|      | 06/11/17 | 290                      | 32.6                           | 0.019            | 0.026           | -27            |
|      | 04/12/17 | 386                      | 29.3                           | 0.028            | 0.047           | -40            |
| E    | 18/01/17 | 14.6                     | 0.292                          | 0.087            | 0.051           | +71            |
|      | 15/02/17 | 13.2                     | 0.359                          | 0.064            | 0.078           | -18            |
|      | 08/03/17 | 19.4                     | 0.933                          | 0.036            | 0.011           | +227           |
|      | 26/04/17 | 11.7                     | 0.134                          | 0.15             | 0.067           | +124           |
|      | 17/05/17 | 13.5                     | 0.109                          | 0.22             | 0.024           | +817           |
|      | 14/06/17 | 15.9                     | 0.284                          | 0.10             | 0.013           | +669           |
|      | 12/07/17 | 14.4                     | 0.146                          | 0.17             | 0.029           | +486           |
|      | 16/08/17 | 11.5                     | 0.407                          | 0.049            | 0.025           | +96            |
|      | 13/09/17 | 10.2                     | 0.814                          | 0.022            | 0.014           | +57            |
|      | 18/10/17 | 8.0                      | 0.742                          | 0.019            | 0.0070          | +171           |
|      | 15/11/17 | 11.5                     | 0.320                          | 0.062            | 0.023           | +170           |
|      | 13/12/17 | 13.3                     | 0.854                          | 0.027            | 0.045           | -40            |

## References

1. L. Z. Benet, F. Broccatelli and T. I. Oprea, BDDCS applied to over 900 drugs, *AAPS Journal*, 2011, **13(4)**, 519 – 547.
2. P. J. Pentikäinen, P. J. Neuvonen and A. Penttilä, Pharmacokinetics of metformin after intravenous and oral administration to man, *European Journal of Clinical Pharmacology*, 1979, **16 (3)**, 195 – 202.
3. G. Tucker, C. Casey, P. Phillips, H. Connor, J. Ward and H. Woods, Metformin kinetics in healthy subjects and in patients with diabetes mellitus, *British Journal of Clinical Pharmacology*, 1981, **12(2)**, 235 – 246.
4. J. W. Faigle and K. F. Feldmann, Pharmacokinetic data of carbamazepine and its major metabolites in man. In: Schneider H, editor. *Clinical pharmacology of antiepileptic drugs*. Berlin: Springer; 1975. 159-65.
5. W. J. Richter, P. Kriemler, J. W. Faigle and A. Frigerio, Newer Aspects of the Biotransformation of Carbamazepine: Structural Characterization of Highly Polar Metabolites. *Recent Developments in Mass Spectrometry in Biochemistry and Medicine: Volume I*. Boston, MA: Springer US; 1978.
6. M. Eichelbaum, K. W. Köthe, F. Hoffmann and G. E. von Unruh, Kinetics and metabolism of carbamazepine during combined antiepileptic drug therapy, *Clinical Pharmacology and Therapeutics*, 1979, **26(3)**, 366 – 371.
7. M. Eichelbaum, K. W. Köthe, F. Hoffmann and G. E. von Unruh, Use of stable labelled carbamazepine to study its kinetics during chronic carbamazepine treatment, *European Journal of Clinical Pharmacology*, 1982, **23(3)**, 241 – 244.
8. I. Bernus, R. G. Dickinson, W. D. Hooper and M. J. Eadie. Early stage autoinduction of carbamazepine metabolism in humans, *European Journal of Clinical Pharmacology*, 1994, **47(4)**, 355 – 360.
9. I. Bernus, W. D. Hooper, R. G. Dickinson and M. J. Eadie, Metabolism of carbamazepine and co-administered anticonvulsants during pregnancy, *Epilepsy Research*, 1995, **21(1)**, 65 – 75.
10. Validus Pharmaceuticals LLC, 2016. [online] Available from: [https://www.accessdata.fda.gov/drugsatfda\\_docs/label/2016/021710s11s012lbl.pdf](https://www.accessdata.fda.gov/drugsatfda_docs/label/2016/021710s11s012lbl.pdf) [Accessed 01/12/2025].
11. I. Bernus, R. G. Dickinson, W. D. Hooper and M. J. Eadie, The mechanism of the carbamazepine-valproate interaction in humans, *British Journal of Clinical Pharmacology*, 1997, **44(1)**, 21 – 27.
12. M. Eichelbaum, T. Toon, G. Tybring and L. Bertilsson, Carbamazepine Metabolism in Man: Induction and Pharmacogenetic Aspects, *Clinical Pharmacokinetics*, 1985, **10(1)**, 80 – 90.
13. B. Deng, H. Yin, Y. Liu and X. Ning, Pharmacokinetics of propranolol hydrochlorid in human urine by capillary electrophoresis coupled with electrochemiluminescence, *Analytical Sciences*, 2011, **27(1)**, 55 – 59.
14. T. Walle, U. Walle, M. Wilson, T. Fagan, and T. Gaffney, Stereoselective ring oxidation of propranolol in man. *British Journal of Clinical Pharmacology*, 1984, **18(5)**, 741 – 748.
15. G. Pflugmann, H. Spahn and E. Mutschler, Rapid determination of the enantiomers of metoprolol, oxprenolol and propranolol in urine, *Journal of Chromatography B: Biomedical Sciences and Applications*, 1987, **416(C)**, 331 – 339.
16. D. W. Schneck, J. Frederick Pritchard, T. P. Gibson, J. E. Vary and A. Hull Hayes Jr, Effect of dose and uremia on plasma and urine profiles of propranolol metabolites, *Clinical Pharmacology and Therapeutics*, 1980, **27(6)**, 744 – 755.
17. S. Carda-Broch, I. Rapado-Martínez, J. Esteve-Romero and M. C. García-Alvarez-Coque, Analysis of urine samples containing cardiovascular drugs by micellar liquid chromatography with fluorimetric detection, *Journal of Chromatographic Science*, 1999, **37(4)**, 93 – 102.
18. T. Walle, U. K. Walle and L. S. Olanoff, Quantitative account of propranolol metabolism in urine of normal man, *Drug Metabolism and Disposition*, 1985, **13(2)**, 204 – 209.
19. K. J. Klamerus, V. D., Parker, R. L. Rudolph, A. T., Derivan and S. T. Chiang, Effects of age and gender on venlafaxine and O-desmethylvenlafaxine pharmacokinetics, *Pharmacotherapy*, 1996, **16(5 I)**, 915 – 923.
20. S. M. Troy, V. D. Parker, D. R. Hicks, F. D. Boudino and S. T. Chiang, Pharmacokinetic interaction between multiple-dose venlafaxine and single-dose lithium, *Journal of Clinical Pharmacology*, 1996, **36(2)**, 175 – 181.

21. S. R. Howell, G. E. M. Husbands, J. A. Scatina and S. F. Sisenwine, Metabolic disposition of 14c-venlafaxine in mouse, rat, dog, rhesus monkey and man, *Xenobiotica*, 1993, **23(4)**, 349 – 359.
22. S. M. Troy, R. W. Schultz, V. D. Parker, S. T. Chiang and R. A. Blum, The effect of renal disease on the disposition of venlafaxine, *Clinical Pharmacology and Therapeutics*, 1994, **56(1)**, 14 – 21.
23. P. Benfield, R. C. Heel and S. P. Lewis, Fluoxetine: A Review of Its Pharmacodynamic and Pharmacokinetic Properties, and Therapeutic Efficacy in Depressive Illness, *Drugs*, 1986, **32(6)**, 481 – 508.
24. R. F. Bergstrom, L. Lemberger, N. A. Farid and R. L. Wolen, Clinical pharmacology and pharmacokinetics of fluoxetine: A review, *British Journal of Psychiatry*, 1988, **153 (SUPPL. 3)**, 47 – 50.
25. L. Dalgaard and C. Larsen, Metabolism and excretion of citalopram in man: Identification of O-acyl- and N-glucuronides, *Xenobiotica*, 1999, **29(10)**, 1033 – 1041.
26. J. Sidhu, M. Priskorn, M., Poulsen, A., Segonzac, G., Grollier and F. Larsen, Steady-state pharmacokinetics of the enantiomers of citalopram and its metabolites in humans, *Chirality*, 1997, **9(7)**, 686 – 692.
27. O. Spigset, S. Hagg, B. Stegmayr and R. Dahlqvist, Citalopram pharmacokinetics in patients with chronic renal failure and the effect of haemodialysis, *European Journal of Clinical Pharmacology*, 2000, **56(9-10)**, 699 – 703.
28. M. Priskorn, F. Larsen, A. Segonzac A. and M. Moulin, Pharmacokinetic interaction study of citalopram and cimetidine in healthy subjects, *European Journal of Clinical Pharmacology*, 1997, **52(3)**, 241 – 242.
29. B. Sogaard, H. Mengel, N. Rao and F. Larsen, The pharmacokinetics of escitalopram after oral and intravenous administration of single and multiple doses to healthy subjects, *Journal of Clinical Pharmacology*, 2005, **45(12)**, 1400 – 1406.
30. PubChem. Ranitidine [online] Available from: <https://pubchem.ncbi.nlm.nih.gov/source/hsdb/3925> [Accessed 01/12/2025].
31. J. McNeil, G. Mihaly, A. Anderson, A. Marshall, R. Smallwood and W. Louis, Pharmacokinetics of the H<sub>2</sub>-receptor antagonist ranitidine in man. *British Journal of Clinical Pharmacology*, 1981, **12(3)**, 411 – 415.
32. A. van Hecken, T. Tjandramaga, A. Mullie, R. Verbesselt and P. De Schepper, Ranitidine: single dose pharmacokinetics and absolute bioavailability in man, *British Journal of Clinical Pharmacology*, 1982, **14(2)**, 195 – 200.
33. FDA. Clarithromycin [online] Available from: [https://www.accessdata.fda.gov/drugsatfda\\_docs/label/2012/050662s044s050,50698s026s030,050775s015s019lbl.pdf](https://www.accessdata.fda.gov/drugsatfda_docs/label/2012/050662s044s050,50698s026s030,050775s015s019lbl.pdf) [Accessed 01/12/2025].
34. D. Mainz, K. Borner, P. Koepe, J. Kotwas and H. Lode, Pharmacokinetics of lansoprazole, amoxicillin and clarithromycin after simultaneous and single administration, *Journal of Antimicrobial Chemotherapy*, 2002, **50(5)**, 699 – 706.
35. S. -Y. Chu, L. T. Sennello, S. T. Bunnell, L. L. Varga, D. S. Wilson and R. C. Sonders, Pharmacokinetics of clarithromycin, a new macrolide, after single ascending oral doses, *Antimicrobial Agents and Chemotherapy*, 1992, **36(11)**, 2447 – 2453.
36. X. Tan and Z. Song, Human saliva-based quantitative monitoring of clarithromycin by flow injection chemiluminescence analysis: A pharmacokinetic study, *Applied Biochemistry and Biotechnology*, 2014, **172(3)**, 1320 – 1331.
37. P. G. Davey, The pharmacokinetics of clarithromycin and its 14-OH metabolite, *Journal of Hospital Infection*, 1991, **19 (SUPPL. A)**, 29 – 37.
38. J. L. Ferrero, B. A. Bopp, K. C. Marsh, S. C. Quigley, M. J. Johnson, D. J. Anderson, J. E. Lamm, K. G. Tolman, S. W. Sanders, J. H. Cavanaugh and R. C. Sonders, Metabolism and disposition of clarithromycin in man, *Drug Metabolism and Disposition*, 1990, **18(4)**, 441 – 446.
